# Supplementary material
Source: Springer Nature journal article supplement (https://www.springermedizin.de/resource/supplementary/12883_2010_387_MOESM7_ESM.pdf/9455038)

# individ ICP (mmHg) vs. tot AMS score

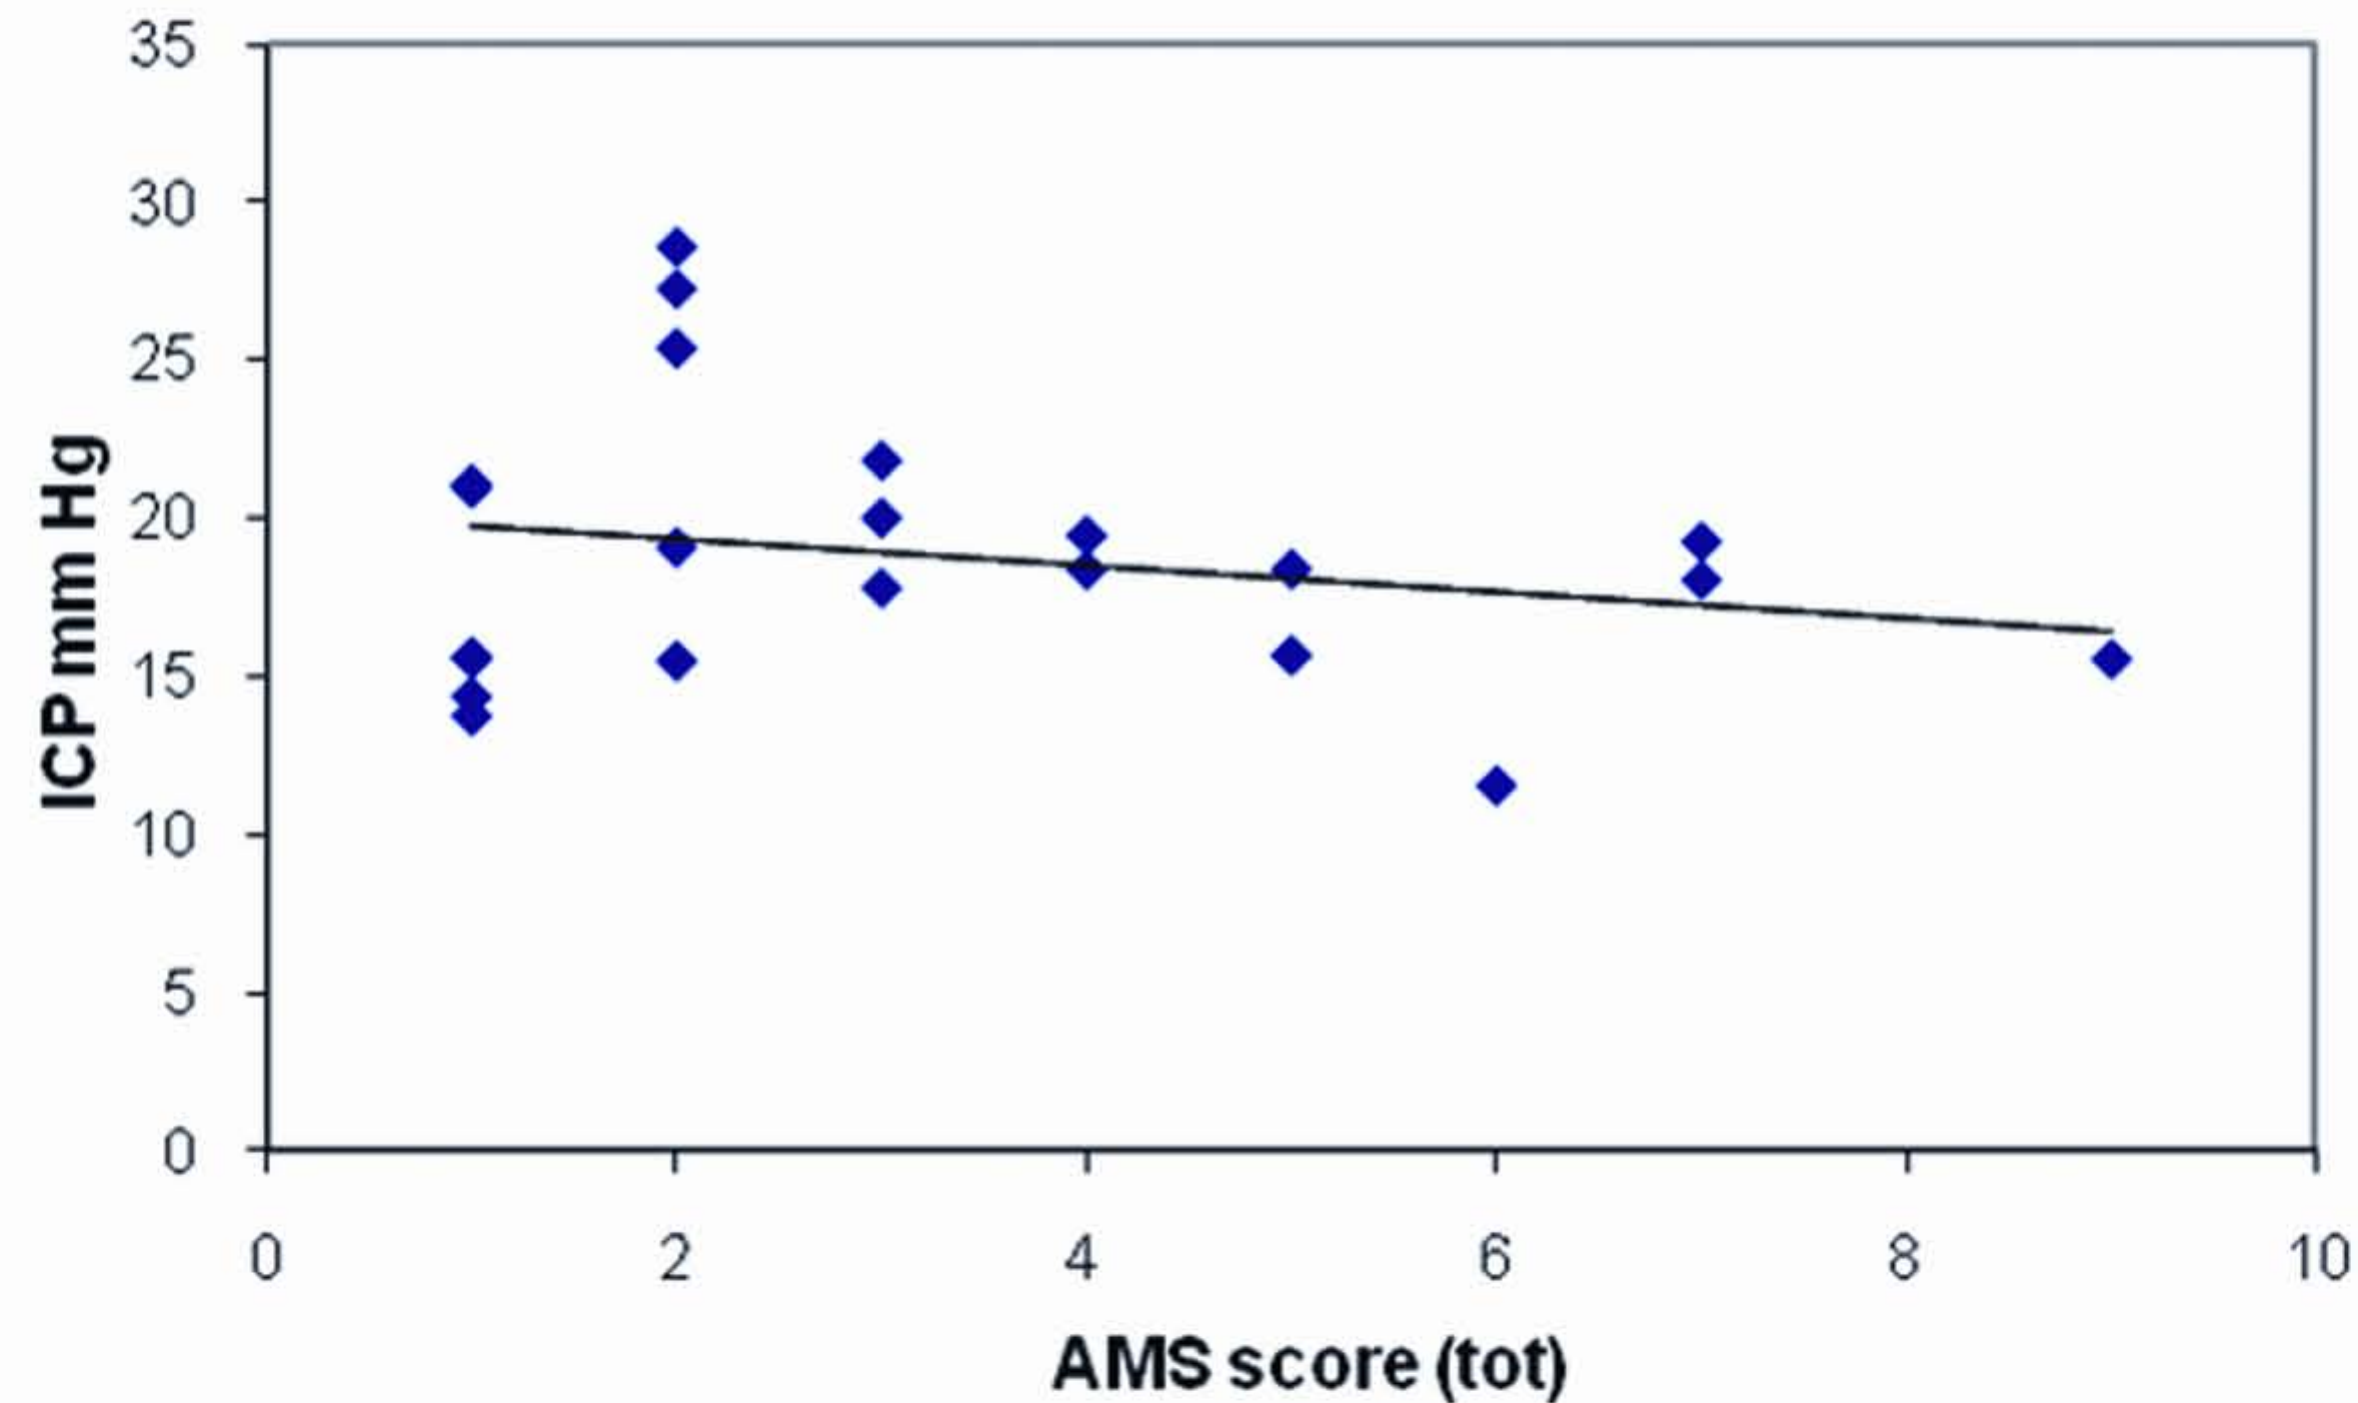

Supplement: MOESM7 [file 9455038]
